# Supplementary material for: Comparing and contrasting barriers in augmentative alternative communication use in nonspeaking autism and complex communication needs: multi-stakeholder perspectives
Source: PubMed Central journal article supplement (PMC11197385; doi:10.3389/fpsyt.2024.1385947), 2024-06-10
Supplement: Presentation_1.pdf [file Presentation_1.pdf]

# Appendix

Cards distributed or shown on a screen to parent-carers to ask them to rank the top three barriers to their child’s AAC use and participation. Themes from Moorcroft et al. (2019a) and Park (2020).

|                                          |                                                       |                                                           |
|------------------------------------------|-------------------------------------------------------|-----------------------------------------------------------|
| AAC user’s abilities/willingness         | Support from therapist/clinician/teacher/professional | AAC knowledge of therapist/clinician/teacher/professional |
| Personal and family attitudes on AAC use | Competing demands (time, money, etc.)                 | Features of AAC systems                                   |
| Support network (family and friends)     | AAC-related service/information accessibility         | Fit of AAC system                                         |

Cards distributed or shown on a screen to clinicians and educators to ask them to rank the top three barriers to their child’s AAC use and participation. Themes from Moorcroft et al. (2019b), Chung and Stoner (2016), and Johnson et al. (2006).

|                           |                                                            |                                 |
|---------------------------|------------------------------------------------------------|---------------------------------|
| Training/knowledge of AAC | Individual’s abilities/willingness                         | Features of AAC systems         |
| Financial resources       | Carers’ attitudes on AAC                                   | Fit of AAC system to individual |
| Support from team/staff   | Other carer-related factors (resource, knowledge, support) | Societal acceptance of AAC use  |

The table below shows a breakdown of attendance format by participant group.

|                     |           |
|---------------------|-----------|
| <b>Focus Groups</b> | <b>18</b> |
| Clinician           | 9         |
| Educator            | 7         |
| Parent              | 2         |
| <b>Interview</b>    | <b>12</b> |
| Clinician           | 3         |
| Educator            | 2         |
| Parent              | 7         |
| <b>Grand Total</b>  | <b>30</b> |

## References

- Chung, Y. C., & Stoner, J. B. (2016). A meta-synthesis of team members' voices: What we need and what we do to support students who use AAC. *Augmentative and Alternative Communication, 32*(3), 175-186. <https://doi.org/10.1080/07434618.2016.1213766>
- Johnson, J. M., Inglebret, E., Jones, C., & Ray, J. (2006). Perspectives of speech language pathologists regarding success versus abandonment of AAC. *Augmentative and Alternative Communication, 22*(2), 85–99. <https://doi.org/10.1080/07434610500483588>
- Moorcroft, A., Scarinci, N., & Meyer, C. (2019a). A systematic review of the barriers and facilitators to the provision and use of low-tech and unaided AAC systems for people with complex communication needs and their families. *Disability and Rehabilitation: Assistive Technology, 14*(7), 710-731. <https://doi.org/10.1080/17483107.2018.1499135>
- Moorcroft, A., Scarinci, N., & Meyer, C. (2019b). Speech pathologist perspectives on the acceptance versus rejection or abandonment of AAC systems for children with complex communication needs. *Augmentative and Alternative Communication, 35*(3), 193-204. <https://doi.org/10.1080/07434618.2019.1609577>
- Park, H. (2020). Parents' Experiences and Acceptance Factors of AAC Intervention for Children with Complex Communication Needs. *Communication Sciences & Disorders, 25*(2), 318–333. <https://doi.org/10.12963/csd.20729>
